# Supplementary material
Source: Springer Nature journal article supplement (https://www.springermedizin.de/resource/supplementary/12913_2012_2283_MOESM1_ESM.pdf/9530288)
Supplement: MOESM1 [file 9530288]

NSW Colorectal  
Cancer Care Survey  
Feb 2000 – Jan 2001  
n=3091

NSW Lung Cancer  
Patterns of Care Study  
Nov 2001 – Dec 2002  
n=1810

Linked by the Centre for  
Health Record Linkage

NSW Central Cancer  
Registry (CCR)  
Jan 1999 – Dec 2002  
n=3038

NSW Central Cancer  
Registry  
Jan 1999 – Dec 2002  
n=1707

Linked by NSW Health

NSW Admitted Patient  
Data Collection (APDC)  
Jul 1998 – Jun 2003  
n=2917

NSW Admitted Patient  
Data Collection  
Jul 1998 – Jun 2003  
n=1580
